# Supplementary material for: Interfacial band offset engineering with barium-doping towards enhanced performance of all inorganic CsPbI2Br perovskite solar cells
Source: Royal Society of Chemistry journal article supplement (doi:10.1039/d3cp02935b), 2023-01-01

## Supporting Information

### Interfacial Band Offset Engineering with Barium-doping Towards Enhanced Performance of all Inorganic CsPbI<sub>2</sub>Br Perovskite Solar Cells

Sachin R. Rondiya,<sup>\*a,b</sup> Sawanta S. Mali,<sup>\*c</sup> Anurag Roy,<sup>d</sup> Gajendra Kumar Inwati,<sup>e</sup> Ganesh K. Rahane,<sup>b</sup> Yogesh A. Jadhav,<sup>f</sup> Sunil Suresh,<sup>g</sup> Tushar Debnath,<sup>b</sup> Chang Kook Hong,<sup>e</sup> and Nelson Y. Dzade<sup>\*a,i</sup>

**Figure S1.** (a and b) Optimized structure for CsPbI<sub>2</sub>Br(010) and Ba:CsPbI<sub>2</sub>Br(010) surfaces.

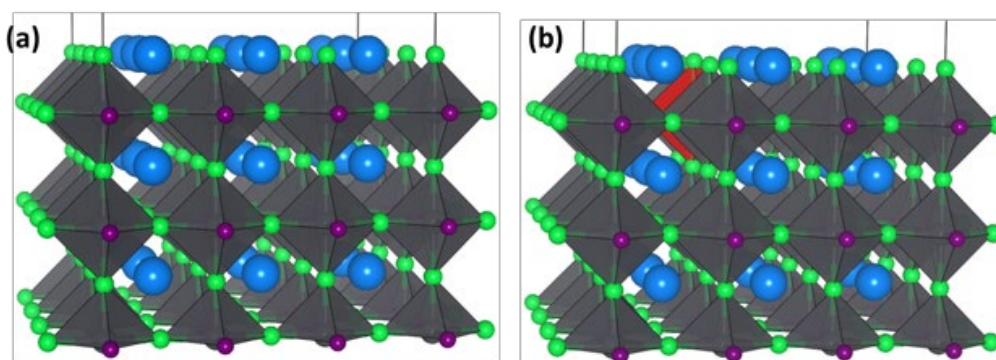

**Figure S2.** (a) Electronic band structures of bulk anatase TiO<sub>2</sub> for Ti-d (blue) and O-p (red) orbitals. Inset: Crystal structure of TiO<sub>2</sub>. (b) Anatate TiO<sub>2</sub> (ETL) modelled in the tetragonal structure predicting the lattice parameters at a=b=3.803 Å, c=9.517 Å, in good agreement with the experimental values.

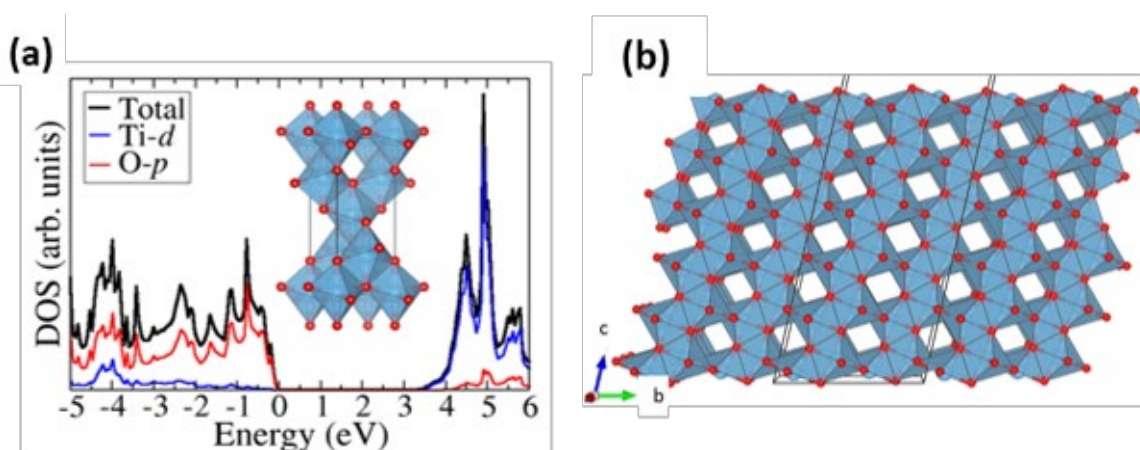

Supplement: d3cp02935b1.pdf [file d3cp02935b1.pdf]
